# Supplementary material
Source: PubMed Central journal article supplement (PMC5953559)
Supplement: NIHMS961945-supplement.pdf [file NIHMS961945-supplement.pdf]

| <b>VirusName_StrainName</b> | <b>Passage # in <i>Rag1</i><sup>-/-</sup> mice</b> | <b>Amino acid at NS3 399</b> | <b>Amino acid at NS4B 18</b> | <b>Lethality in mice</b> |
|-----------------------------|----------------------------------------------------|------------------------------|------------------------------|--------------------------|
| <b>ZIKV_Dakar</b>           | <b>Parental</b>                                    | <b>K</b>                     | <b>G</b>                     | <b>Low</b>               |
| <b>ZIKV_Dakar</b>           | <b>P1</b>                                          | <b>N.D.</b>                  | <b>N.D.</b>                  | <b>N.D.</b>              |
| <b>ZIKV_Dakar</b>           | <b>P2</b>                                          | <b>K</b>                     | <b>R</b>                     | <b>High</b>              |
| <b>ZIKV_Dakar</b>           | <b>P3</b>                                          | <b>K</b>                     | <b>R</b>                     | <b>High</b>              |
| <b>ZIKV_Dakar</b>           | <b>P4</b>                                          | <b>R</b>                     | <b>R</b>                     | <b>High</b>              |

**Table S1, Related to Figure 1. Mutations acquired by ZIKV-Dak during serial passage in mice.** Table listing the passage number of ZIKV-Dak in *Rag1*<sup>-/-</sup> mice, amino acid at position NS3 399 and NS4B G18R, and the observed lethality in 4-5 week-old C57BL/6 mice pretreated with anti-Ifnar1 antibody, of each passaged ZIKV-Dak isolate. (Lethality; Low = <75% lethality, High = > 75% lethality, N.D. = not determined).

**Table S2. List of primers for Key Resources Table**

| <b>Primer Name</b>                      | <b>Primer Sequence (5' – 3')</b>                          |
|-----------------------------------------|-----------------------------------------------------------|
| <b>Titering ZIKV primers</b>            |                                                           |
| ZIKV RNA: Forward                       | 5'-CCACCAATGTTCTCTTGCAGACATATTG-3'                        |
| ZIKV RNA: Reverse                       | 5'- TTCGGACAGCCGTTGTCCAACACAAG-3'                         |
| ZIKV RNA: Probe                         | 5'-/56-<br>FAM/AGCCTACCT/ZEN/TGACAAGCAGTC/3IABkFQ/-<br>3' |
| <b>hSTAT2 genotyping primers</b>        |                                                           |
| hSTAT2 genotyping 5079-42               | 5'- CTGAGGTAGAATCACTTTGACTTCC -3'                         |
| hSTAT2 genotyping 5079-43               | 5'- GATGGCTCAGAGGTTAAGAGC -3'                             |
| hSTAT2 genotyping 5080-46               | 5'- GGCAAAGCCAAGACATAAACC -3'                             |
| hSTAT2 genotyping 5080-47               | 5'- ACAGGTTCCAGGCCATCAAG -3'                              |
| <b>qRTPCR primers</b>                   |                                                           |
| <i>Oas1a</i> Forward                    | 5'-ATGGAGCACGGACTCAGGA-3'                                 |
| <i>Oas1a</i> Reverse                    | 5'-TCACACACGACATTGACGGC-3'                                |
| <i>Ifnβ</i> Forward                     | 5'-CAGCTCCAAGAAAGGACGAAC-3'                               |
| <i>Ifnβ</i> Reverse                     | 5'-GGCAGTGTAACTCTTCTGCAT-3'                               |
| <i>Irf7</i> Forward                     | 5'-GAGACTGGCTATTGGGGGAG-3'                                |
| <i>Irf7</i> Reverse                     | 5'-GACCGAAATGCTTCCAGGG-3'                                 |
| <i>18S rRNA</i> Forward                 | 5'- GTAACCCGTTGAACCCCAT-3'                                |
| <i>18S rRNA</i> Reverse                 | 5'-CCATCCAATCGGTAGTAGCG-3'                                |
| <b>Sequencing ZIKV primers</b>          |                                                           |
| ZIKV-Dakar 3500-7000 amplifying primer: | 5'- AGA AAG GAA CCA GAG AGC AAC TTA-3'                    |
| ZIKV-Dakar 7100-3500 amplifying primer: | 5'- GTGGTTACCGCATGTTGG-3'                                 |
| ZIKV-Dakar 5500 sequencing primer:      | 5'-TGCACGAGGATATATATCAACAAGGG-3'                          |
| ZIKV-Dakar 6500 sequencing primer:      | 5'- TTG CCA GGA CAC ATG ACA GAG-3'                        |
| <b>ZIKV amplicon primers</b>            |                                                           |
| ZIKV Conserved 1For.                    | AGTTGTTGATCTGTGTGAATCAGAC                                 |
| ZIKV Conserved 1821Rev.                 | CTTTGCACCATCCATCTCAGCCTC                                  |
| ZIKV Conserved 1663For.                 | GCAGACACCGGAACCTCCACACT                                   |
| ZIKV Conserved 3499Rev.                 | GCCTTATCTCCATTCCATACCA                                    |
| ZIKV Conserved 3367For.                 | CWAGAGGACCATCTCTGAGATCAAC                                 |
| ZIKV Conserved 5078Rev.                 | CACGACCCCATGCCATAAAGTC                                    |
| ZIKV Conserved 4665For.                 | GACCACAGATGGAGTGTACAGAGT                                  |
| ZIKV Conserved 6086Rev.                 | CTTGCTTCAAGCCAGTGTGC                                      |
| ZIKV African 6019For.                   | ATGAGTACATGTATGGAGGTGGGTG                                 |
| ZIKV Sen 7580Rev.                       | GTGAGGTGGCTGTGGAGGAG                                      |
| ZIKV Sen 7521For.                       | CAGCAGCAACCTCCACCTTATG                                    |
| ZIKV Conserved 9037Rev.                 | CCCATCATGTTGTACACACAGCT                                   |
| ZIKV Conserved 8989For.                 | ARCACCACCTGAGAGGAGAGTG                                    |
| ZIKV Conserved 10140Rev.                | GGTCGTTCTCCTCAATCCACACT                                   |
| ZIKV Conserved 9857For.                 | CCGCCACCAAGATGAACTGATTG                                   |
| ZIKV 3' UTR end Rev.                    | AGACCCATGGATTTCCCCACACC                                   |

| A                                          |                | NS3 alignment       | 398                 | 408                 | 418 |
|--------------------------------------------|----------------|---------------------|---------------------|---------------------|-----|
| VirusName_StrainName                       |                |                     |                     |                     |     |
| <b>Passaged Zika viruses</b>               |                |                     |                     |                     |     |
| ZIKV_Dakar Parental P0                     |                | K T F E T E F Q K T | K N Q E W D F V I T | T D I S E M G A N F |     |
| ZIKV_Dakar P2                              |                | K T F E T E F Q K T | K N Q E W D F V I T | T D I S E M G A N F |     |
| ZIKV_Dakar P3                              |                | K T F E T E F Q K T | K N Q E W D F V I T | T D I S E M G A N F |     |
| ZIKV_DakarMA P4                            |                | K T F E T E F Q K T | R N Q E W D F V I T | T D I S E M G A N F |     |
| <b>Other Zika viruses</b>                  |                |                     |                     |                     |     |
| ZIKV_MR766-NIID                            |                | K T F E T E F Q K T | K N Q E W D F V I T | T D I S E M G A N F |     |
| ZIKV_Arb 13565                             |                | K T F E T E F Q K T | K N Q E W D F V I T | T D I S E M G A N F |     |
| ZIKV_Beh19015                              |                | K T F E T E F Q K T | K H Q E W D F V I T | T D I S E M G A N F |     |
| ZIKV_H1PF/2013                             |                | K T F E T E F Q K T | K H Q E W D F V I T | T D I S E M G A N F |     |
| ZIKV_PRVABC59                              |                | K T F E T E F Q K T | K H Q E W D F V I T | T D I S E M G A N F |     |
| <b>Mosquito-borne flaviviruses</b>         |                |                     |                     |                     |     |
| SPOV_Chuku                                 |                | K T F E T E Y Q K T | K N G E W D F V V T | T D I S E M G A N F |     |
| DENV_16007                                 |                | K T F D T E Y Q K T | K N N D W D Y V V T | T D I S E M G A N F |     |
| DENV_16681                                 |                | K T F D S E Y A K T | R T N D W D F V V T | T D I S E M G A N F |     |
| DENV_H87                                   |                | K T F D T E Y Q K T | K L N D W D F V V T | T D I S E M G A N F |     |
| DENV_H241                                  |                | K T F D T E Y P K T | K L T D W D F V V T | T D I S E M G A N F |     |
| YFV_Aslibi                                 |                | K T F E R E Y P T I | K Q K K P D F I L A | T D I A E M G A N L |     |
| JEV_Nakayama                               |                | K S Y D T E Y P K C | K N G D W D F V I T | T D I S E M G A N F |     |
| WNV_NewYork99                              |                | K S Y E T E Y P K C | K N D D W D F V I T | T D I S E M G A N F |     |
| SLEV_Beh355964                             |                | K S F D T E Y P K T | K N E W D F V V T   | T D I S E M G A N F |     |
| SEPV                                       |                | K T F E K E Y P T I | K S K R P D F I L A | T D I A E M G A N L |     |
| ENTV_UgIL-30                               |                | R T F D Q E Y P K I | K D S R P D F I L T | T D I A E M G A N L |     |
| MVEV_MVE-1-51                              |                | K S Y D T E Y P K C | K N G D W D F V I T | T D I S E M G A N F |     |
| USUV_Vienna 2001                           |                | K S Y D T E Y P K C | K N G D W D F V I T | T D I S E M G A N F |     |
| KOKV_AusMRM 32                             |                | K T F E S E Y P K C | K S E K W D F V I T | T D I S E M G A N F |     |
| ILHV_Original                              |                | K S Y D S E Y Q K C | K N D W D F V I T   | T D I S E M G A N F |     |
| ROCV_SPH34675                              |                | K S Y E T E Y Q K C | K N D W D Y V V T   | T D I S E M G A N F |     |
| BAGV_DakAr B209                            |                | K S F D S E Y P K C | K T G E W D F V I T | T D I S E M G A N F |     |
| IGUV_SPAn 71686                            |                | K T F D S E Y K K T | K Q D W D F V I T   | T D I S E M G A N F |     |
| BSQV_BeAn 4073                             |                | R T F N T E Y P K C | K Q G D W D F V V T | T D I S E M G A N F |     |
| KEDV_DakAar D1470                          |                | K S F N T E Y Q R T | K N E Q W D F V I T | T D I S E M G A N F |     |
| <b>Tick-borne flaviviruses</b>             |                |                     |                     |                     |     |
| DTV_ctb30                                  |                | K T F D K D Y G R V | R E E K P D F V V T | T D I S E V G A N L |     |
| POWV_LB                                    |                | K T F D K D Y G R V | H E E K P D F V V T | T D I S E M G A N L |     |
| AHFV_200300001                             |                | K T F E K D Y L R V | R E E K P D F V V T | T D I S E M G A N L |     |
| LGTV_TP21                                  |                | K T F D K E Y S R V | K D E K P D F V V T | T D I S E M G A N L |     |
| OHFV_Bogoluvovska                          |                | K T F E K D Y S R V | R D E K P D F V V T | T D I S E M G A N L |     |
| TBEV_Sofjin                                |                | K T F E K D Y S R V | R D E K P D F V V T | T D I S E M G A N L |     |
| LIV_369/12                                 |                | K T F E K D Y S R V | R E E K P D F V V T | T D I S E M G A N L |     |
| KFDV_P9605                                 |                | K T F E K D Y L R V | R E E K P D F V V T | T D I S E M G A N L |     |
| <b>No known insect vector flaviviruses</b> |                |                     |                     |                     |     |
| TABV                                       |                | Q T F N N T Y E A A | K T M E Q G L I L T | T N I S E M G A N Y |     |
| RBV_RIMAR                                  |                | K T F H D N Y P K L | Q S E K P D F I L T | T D I S E M G A N L |     |
| MODV_M544                                  |                | K T F H D N Y P K L | N D E K P D F I L T | T D I S E M G A N L |     |
| APOIV_ApMAR                                |                | K T F S E V Y P T L | R D S K P D F I L T | T D I S E M G A N F |     |
| <b>Insect only flaviviruses</b>            |                |                     |                     |                     |     |
| KRV_SR-82                                  |                | A N F S A N Y A Q A | S S E E T T L V V S | T D I S E M G A N L |     |
| <b>B</b>                                   |                |                     |                     |                     |     |
| VirusName_StrainName                       | NS4B alignment | 1                   | 10                  | 20                  | 30  |
| <b>Passaged Zika viruses</b>               |                |                     |                     |                     |     |
| ZIKV_Dakar Parental P0                     |                | N E L G W L E R T K | S D I A H L M G R K | E E - - G T T M G F |     |
| ZIKV_Dakar P2                              |                | N E L G W L E R T K | S D I A H L M R R K | E E - - G T T M G F |     |
| ZIKV_Dakar P3                              |                | N E L G W L E R T K | S D I A H L M R R K | E E - - G T T M G F |     |
| ZIKV_DakarMA P4                            |                | N E L G W L E R T K | S D I A H L M R R K | E E - - G T T M G F |     |
| <b>Other Zika viruses</b>                  |                |                     |                     |                     |     |
| ZIKV_MR766-NIID                            |                | N E L G W L E R T K | N D I A H L M G R R | E E - - G A T M G F |     |
| ZIKV_Arb 13565                             |                | N E L G W L E R T K | N D I A H L M G R R | E E - - G V T M G F |     |
| ZIKV_Beh19015                              |                | N E L G W L E R T K | S D L S H L M G R R | E E - - G A T I G F |     |
| ZIKV_H1PF/2013                             |                | N E L G W L E R T K | S D L S H L M G R R | E E - - G A T I G F |     |
| ZIKV_PRVABC59                              |                | N E L G W L E R T K | S D L S H L M G R R | E E - - G A T I G F |     |
| <b>Mosquito-borne flaviviruses</b>         |                |                     |                     |                     |     |
| SPOV_Chuku                                 |                | N E L G W L E R T K | S D L T R L F W R E | H A E P T G G R G F |     |
| DENV_16007                                 |                | N E M G L L E T T K | K D L G I - - - -   | - - - - G H V A A E |     |
| DENV_16681                                 |                | N E M G F L E K T K | K D L - - - G L G   | S I A T Q Q P E S N |     |
| DENV_H81                                   |                | N E M G L L E T T K | R D L G - - M S K E | P G V V S S T S Y - |     |
| DENV_H241                                  |                | N E M G L I E K T K | T D F G F Y Q V K T | E T T I - - - - -   |     |
| YFV_Aslibi                                 |                | N E L G M L E K T K | E D L - - - F G K K | N L - - I P S S A S |     |
| WNV_NewYork99                              |                | N E M G W L D K T K | S D I S S L F G Q R | I E V K E N F S M G |     |
| JEV_Nakayama                               |                | N E Y G M L E X T K | A D L K S M F G G K | T Q A S G L T G L P |     |
| SLEV_Beh355964                             |                | N E M S L L E K T K | S D I A K L F G G Q | P G S V G F A V R T |     |
| SEPV                                       |                | N E M G M L E K T K | R D I - - - F G T T | - - - - V V E E G K |     |
| ENTV_UgIL-30                               |                | N E N G Y L E K T K | A D I - - - F G H K | Q M - - R T M P V N |     |
| MVEV_MVE-1-51                              |                | N E Y G M L E R T K | T D I R N L F G K S | L I E E N E V H I P |     |
| USUV_Vienna 2001                           |                | N E Y G M L E R T K | S D L G A H L M S T | R I Q S L P L P     |     |
| KOKV_AusMRM 32                             |                | N E M G W L E K T K | A D L S W V V R G R | S S T T T P V V - - |     |
| ILHV_Original                              |                | N E M G W L E T T K | K D I G K L F R S S | G D T Q E Q S T W Q |     |
| ROCV_SPH34675                              |                | N E M G W L D T T K | R D L G K L F S G P | S A V T T S R - - - |     |
| BAGV_DakAr B209                            |                | N E M G W L E Q T K | K D V A S L F G R A | H H - Q E P S R W E |     |
| IGUV_SPAn 71686                            |                | N E M G Y L E K T K | N D I I S L W G R S | R E - - Q N S T L Q |     |
| BSQV_BeAn 4073                             |                | N E M G M L E R T K | Q D L A G V F H K E | E R K S T E F T L L |     |
| KEDV_DakAar D1470                          |                | N E A G L L E R T K | A D I A G L V L K E | E V - - R H P Q W S |     |
| <b>Tick-borne flaviviruses</b>             |                |                     |                     |                     |     |
| DTV_ctb30                                  |                | N E L G Y L E R T K | A D I A G L F R Y D | T Q - - G D R V W D |     |
| POWV_LB                                    |                | N E L G Y L E Q T K | T D I S G L F R R E | D Q - - G G M V W D |     |
| AHFV_200300001                             |                | N E M G M L D K T K | A D L A G L M W R G | E Q - - R H P A W E |     |
| LGTV_TP21                                  |                | N E M G L L E K T K | A D L A L F A R D   | Q G - - E T V R W G |     |
| OHFV_Bogoluvovska                          |                | N E M G F L E K T K | A D L S A V L W S E | R E - - E P R V W S |     |
| TBEV_Sofjin                                |                | N E M G F L E K T K | A D L S T V L W S E | H E - - E L R S W E |     |
| LIV_369/12                                 |                | N E M G F L E K T K | A D L S A M L W S G | H E - - E H R Q W S |     |
| KFDV_P9605                                 |                | N E M G M L D K T K | A D L A G L V W R G | E Q - - R H P Q W S |     |
| <b>No known insect vector flaviviruses</b> |                |                     |                     |                     |     |
| TABV                                       |                | - - - - - - - D     | G E I L T L I K K L | I K V K I Q Q I E N |     |
| RBV_RIMAR                                  |                | N E M R L L E N T K | R D I M D L F K R D | T T V N E S P V F H |     |
| MODV_M544                                  |                | N E L R W L E N T K | E D I K Q L F G E K | I H M - G I S S S G |     |
| APOIV_ApMAR                                |                | N E M G F L E R T K | K D F R E F F R K E | V N M D G E P T Q - |     |
| <b>Insect only flaviviruses</b>            |                |                     |                     |                     |     |
| KRV_SR-82                                  |                | W E M R L F P N I R | G D I M E M A S A M | K E P Q E T O S Q A |     |

Figure S1, Related to Figure 1. NS3 R399 and NS4B R18 is not observed in other ZIKV strains. A-B. MUSCLE sequence alignment examining the conservation of NS3 R399 (A) and

NS4B R18 (**B**) among ZIKV and related flaviviruses. Amino acid positions were determined using ZIKV-Dakar as the reference sequence. Virus abbreviation, virus name (accession number): AHFV, Alkurma hemorrhagic fever virus (JF416954); APOIV, Apoi virus (AF160193); BAGV, Bagaza virus (AY632545); BSQV, Bussuquara virus (AY632536); DENV, Dengue virus (AF180818, KU725663, KU050695, KR011349); DTV, Deer tick virus (AF311056); ENTV, Entebbe bat virus (AY632537); IGUV, Iguape virus (AY632538); ILHV, Ilheus virus (NC\_009028); JEV, Japanese encephalitis virus (EF571853); KEDV, Kedougou virus (AY632540); KFDV, Kyanasur Forest disease virus (JF416958); KOKV, Kokobera virus (NC\_009029); KRV, Kamiti River virus (NC\_005064); LGTV, Langat virus (AF253419); LIV, Louping ill virus (Y07863); MODV, Modoc virus (AJ242984); MVEV, Murrumbidgee Valley encephalitis virus (AF161266); OHFV, Omsk Hemorrhagic fever virus (AY193805); POWV, Powassan virus (NC\_003687); RBV, Rio Bravo virus (AF144692); ROCV, Rocio virus (AY632542); SEPV, Sepik virus (AY632543); SLEV, Saint Louis encephalitis virus (KM267635); SPOV, Spondweni virus (KX227369); TABV, Tamana bat virus (AF285080); USUV, Usutu virus (NC\_006551); WNV, West Nile virus (HQ596519); YFV, Yellow fever virus (AY640589); ZIKV, Zika virus (KU365778, KJ776791, KU501215, LC002520, KF268948).

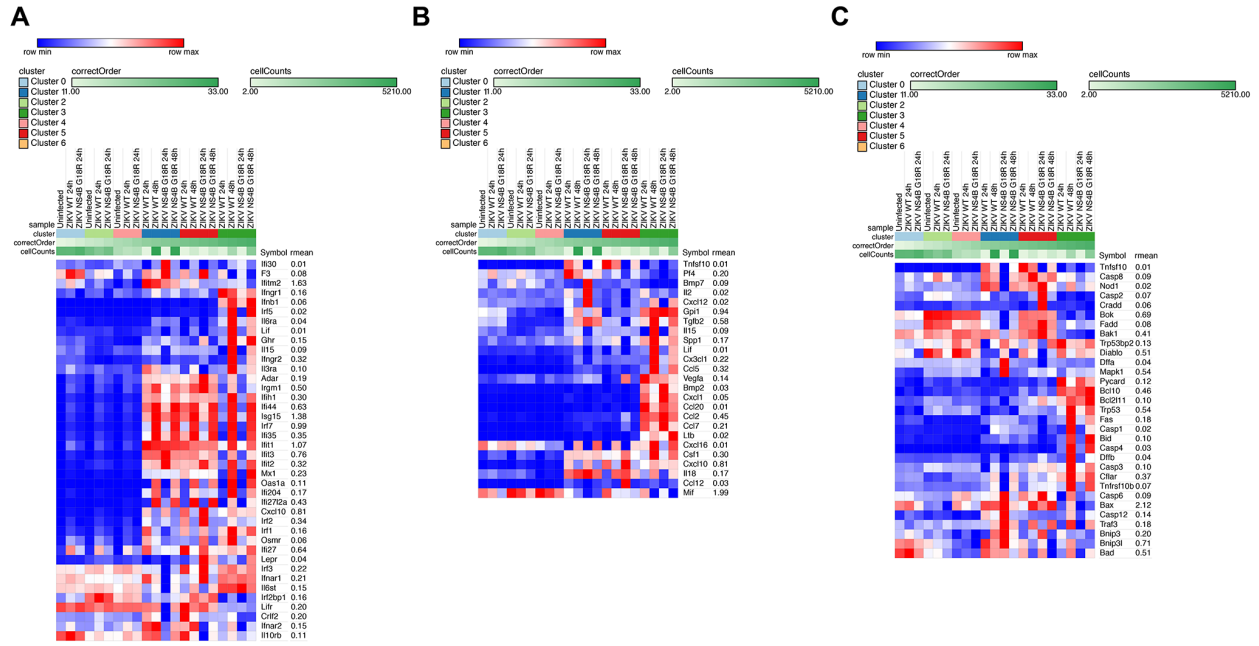

**Figure S2, Related to Figure 5. Heatmap of genes between uninfected, ZIKV-Dak WT, and ZIKV-Dak NS4B G18R infected NSCs. Relative expression of genes representing interferon response (A), cytokine response (B), and apoptosis (C) related genes from the RNAseq experiment in Fig 5 with NSCs infected with ZIKV-Dak WT and ZIKV-Dak NS4B G18R at 0 (uninfected), 24 and 48 h.**

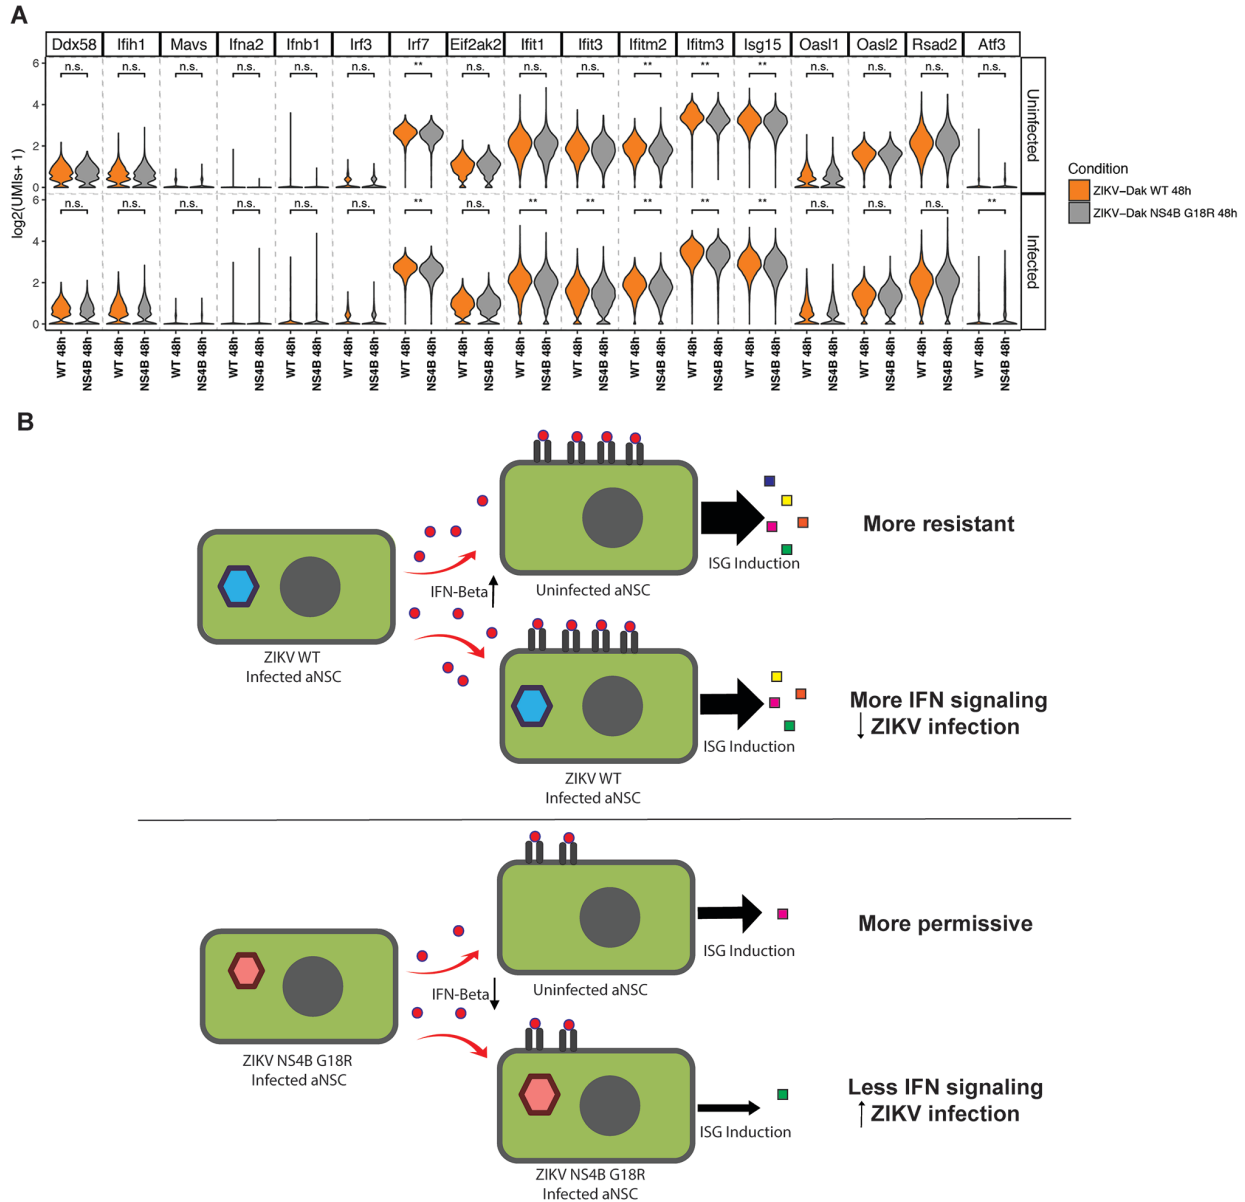

**Figure S3, Related to Figure 5. Single-cell RNAseq analysis RLRs, IFNs, and ISG expression after ZIKV-Dak WT or ZIKV-Dak NS4B G18R infection of NSCs. (A)** Violin plots showing expression of selected RLRs (*Ddx58*, *Ifih1*, and *Mavs*), type I IFNs (*Ifna2* and *Ifnb1*), and ISGs (*Eif2ak2*, *Ifit1*, *Ifit3*, *Ifitm2*, *Ifitm3*, *Isg15*, *Oasl1*, *Oasl2*, and *Rsad2*) in uninfected (ZIKV RNA-negative) and infected (ZIKV-RNA-positive) cells in the culture at 48 h after inoculation with ZIKV-Dak WT or ZIKV-Dak NS4B G18R. A MAST test was used to determine the statistical difference in expression of genes between different conditions. (\*\*  $P$  adjusted < 0.01). **(B)** A model showing the differences in ISG production from ZIKV-Dak-infected, ZIKV-Dak NS4B G18R-infected, and uninfected cells.

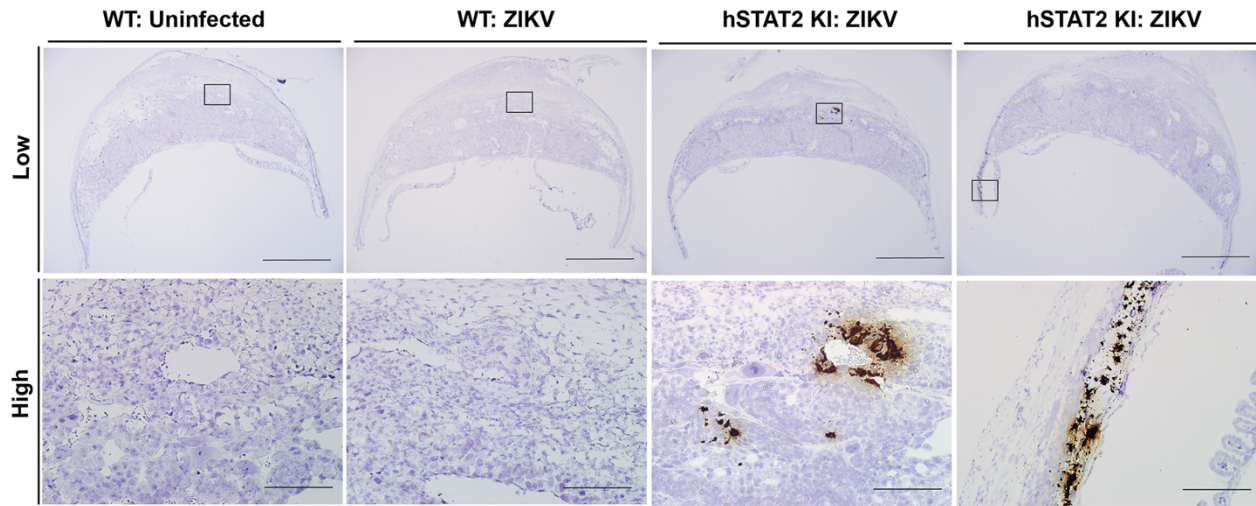

**Figure S4, Related to Figure 6. ZIKV RNA in the placenta and uterine lining of hSTAT2 KI mice.** WT or hSTAT2 KI mice were uninfected (column 1) or inoculated with ZIKV (columns 2-4) at E6.5. At E13.5, placentas were harvested and subjected to RNA *in situ* hybridization with a ZIKV-specific probe. Viral RNA was detected in the junctional zone of the placenta (third column) and uterine lining (fourth column) of hSTAT2 KI dams infected with ZIKV-Dak-MA. No viral RNA was detected in WT dams. Low (scale bar, 2 mm) and high (scale bar, 200  $\mu$ m) magnification images are presented in sequence with the boxes indicating regions. The images are representative of several placentas from independent dams.

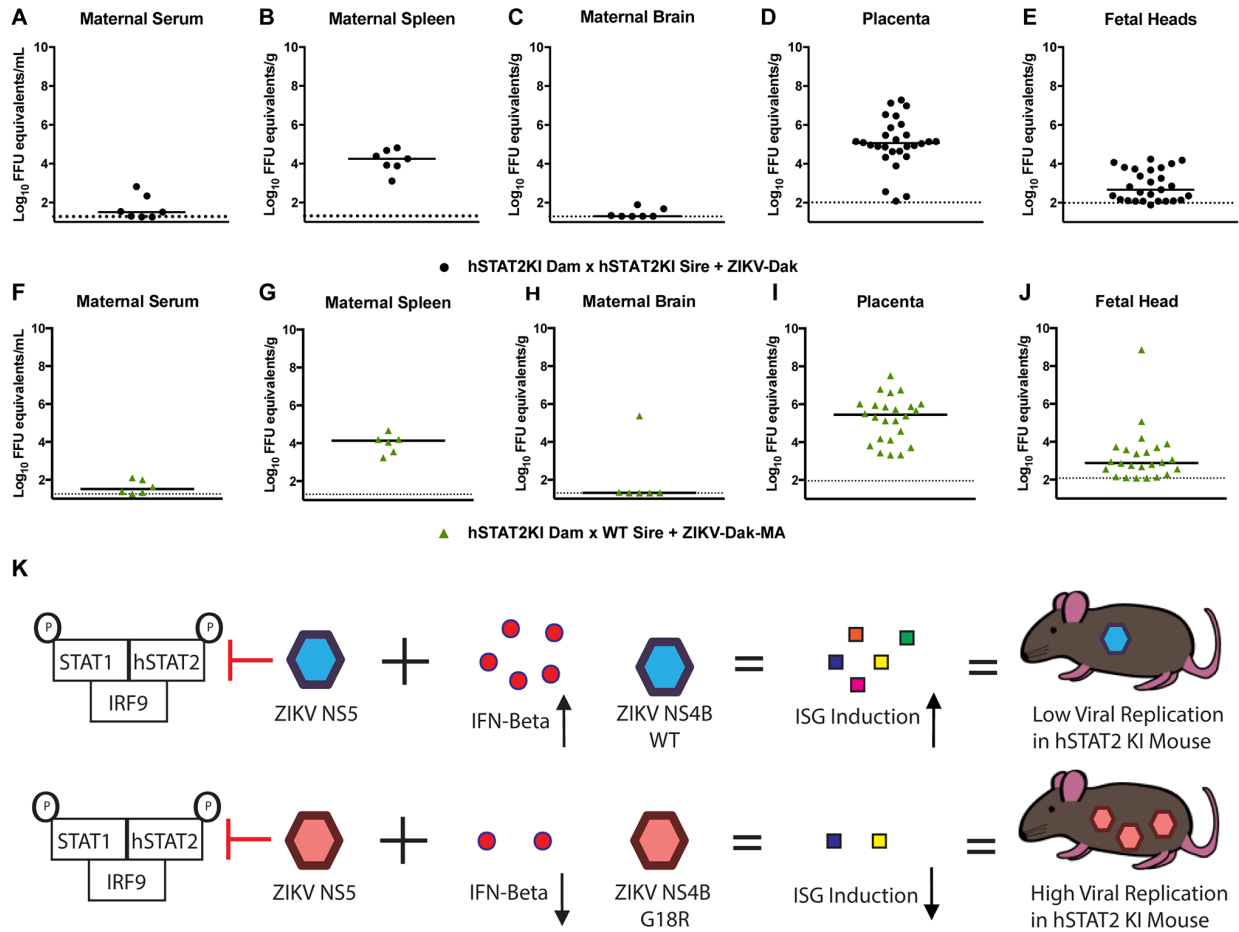

**Figure S5, Related to Figure 6. Susceptibility of maternal and fetal tissues of hSTAT2 KI mice to ZIKV infection.** Viral RNA burden from maternal serum (**A, F**), maternal spleen (**B, G**), maternal brain (**C, H**), placenta (**D, I**), and fetal head (**E, J**) of sexually mature (>8 weeks old) hSTAT2 KI dams mated to hSTAT2 KI sires and inoculated subcutaneously with  $10^6$  FFU of ZIKV-Dak (**A-E**) or WT sires and inoculated subcutaneously with  $10^6$  FFU ZIKV-Dak-MA (**F-J**). Dams were infected on E6.5 and tissues were harvested on E13.5. Data (**A-E**) are from 2 independent experiments ( $n = 7$  dams,  $n = 28$  placentas and fetal heads). Data (**F-J**) are from 2 independent experiments ( $n = 6$  dams,  $n = 24$  placentas and fetal heads). Solid lines represent the median values, and dotted lines denote the limit of detection of the assay. (**K**) A scheme depicting the ZIKV immunocompetent mouse model. The combined effects of the ZIKV NS5 inhibiting hSTAT2 and ZIKV NS4B G18R mutation decreasing amounts of IFN- $\beta$  production results in lower levels of ISG that enable increased ZIKV replication and pathogenicity.
